# Supplementary material for: Increased Antibiotic Resistance in Children with Helicobacter pylori Infection: A Retrospective Study
Source: MDPI journal article supplement (doi:10.3390/pathogens11020178), 2022-01-27
Supplement: s1 [file s1]

**Table S1.** Statistical tests regarding correlation between rapid urease test (RUT), stool antigen test, and histopathology.

|                                          |                                                                                                                       |
|------------------------------------------|-----------------------------------------------------------------------------------------------------------------------|
| <b>Stool antigen test – RUT (n = 35)</b> | <i>Fisher's exact test: <math>p = 0.119</math></i>                                                                    |
| Histopathology – RUT (n = 105)           | <i>Pearson chi-square test: Chi-Square (1) = 14.72, <math>p &lt; 0.001</math>, phi/Cohen's <math>w = 0.374</math></i> |

**Table S2.** Comparison of E-test and Agar diffusion test.

|                                | <b>subject 1</b> | <b>subject 2</b> | <b>subject 3</b> | <b>subject 4</b> |
|--------------------------------|------------------|------------------|------------------|------------------|
| <b>Age [years]</b>             | 11               | 8                | 15               | 14               |
| <b>Chronic symptoms</b>        | yes              | yes              | yes              | yes              |
| <b>Pre-Helicobacter pylori</b> | +                | +                | +                | +                |
| <b>Amoxicillin</b>             |                  |                  |                  |                  |
| <i>E-test</i>                  | susceptible      | susceptible      | susceptible      | susceptible      |
| <i>Agar diffusion test</i>     | resistant        | susceptible      | susceptible      | susceptible      |
| <b>Clarithromycin</b>          |                  |                  |                  |                  |
| <i>E-test</i>                  | resistant        | susceptible      | susceptible      | susceptible      |
| <i>Agar diffusion test</i>     | resistant        | susceptible      | susceptible      | resistant        |
| <b>Metronidazole</b>           |                  |                  |                  |                  |
| <i>E-test</i>                  | resistant        | resistant        | susceptible      | susceptible      |
| <i>Agar diffusion test</i>     | resistant        | resistant        | susceptible      | susceptible      |
